# Supplementary material
Source: MDPI journal article supplement (https://www.mdpi.com/2076-3298/10/12/205)
Supplement: s1 [file s1]

Note: Asterisks and/or bold p-values denote significance ( $\alpha = 0.05$  for all). Treatments: LW = lagoon water, OW = oyster water, SO = stormwater outfall water, OF = oyster feces, and OP = oyster pseudofeces.

**Table S1. Differences in temperature and salinity between seasons.** Results of a Mann-Whitney U test and corresponding summary statistics based on raw data.

*Mann-Whitney U Test*

| Factor             | U     | Standardized U | Expected Value | Variance (U) | p-value           |
|--------------------|-------|----------------|----------------|--------------|-------------------|
| Temperature (°C) * | 0     | -5.563         | 220.5          | 1564.116     | <b>&lt;0.0001</b> |
| Salinity (ppt)     | 202.5 | 0              | 210.0          | 1462.573     | 0.852             |

*Summary Statistics: Temperature (°C)*

| Variable | Observations | Minimum | Maximum | Mean | SD  |
|----------|--------------|---------|---------|------|-----|
| January  | 21           | 13.0    | 24.0    | 17.4 | 3.1 |
| July     | 21           | 28.0    | 32.0    | 29.4 | 1.1 |

*Summary Statistics: Salinity (ppt)*

| Variable | Observations | Minimum | Maximum | Mean | SD   |
|----------|--------------|---------|---------|------|------|
| January  | 20           | 0.0     | 37.0    | 22.7 | 12.1 |
| July     | 21           | 0.0     | 35.0    | 24.7 | 8.5  |

**Table S2. Differences in PPM relative abundance and richness between groups.** Results of two-way mixed ANOVAs on trimmed means (*bwtrim*) and subsequent post-hoc tests (*mcp2atm*) based on raw data.

*Two-way Mixed ANOVA on Trimmed Means: Relative Abundance*

| Factor           | Value   | DF1 | DF2     | p-value           | Significant |
|------------------|---------|-----|---------|-------------------|-------------|
| Season           | 0.0574  | 1   | 21.3362 | 0.8130            |             |
| Treatment        | 58.9892 | 4   | 18.8867 | <b>&lt;0.0001</b> | *           |
| Season:Treatment | 0.1372  | 4   | 18.8867 | 0.9665            |             |

*Post-hoc Test p-values: Relative Abundance*

|    | LW                | OW                | SO                | OF     | OP |
|----|-------------------|-------------------|-------------------|--------|----|
| LW | 1                 |                   |                   |        |    |
| OW | 0.1108            | 1                 |                   |        |    |
| SO | 0.1745            | 0.5259            | 1                 |        |    |
| OF | <b>&lt;0.0001</b> | <b>&lt;0.0001</b> | <b>&lt;0.0001</b> | 1      |    |
| OP | <b>&lt;0.0001</b> | <b>&lt;0.0001</b> | <b>&lt;0.0001</b> | 0.6101 | 1  |

*Two-way Mixed ANOVA on Trimmed Means: Richness*

| Factor           | Value    | DF1 | DF2     | p-value           | Significant |
|------------------|----------|-----|---------|-------------------|-------------|
| Season           | 2.7552   | 1   | 25.9996 | 0.1090            |             |
| Treatment        | 127.5732 | 4   | 19.4692 | <b>&lt;0.0001</b> | *           |
| Season:Treatment | 2.4369   | 4   | 19.4692 | 0.0817            |             |

*Post-hoc Test p-values: Richness*

|    | LW                | OW                | SO                | OF     | OP |
|----|-------------------|-------------------|-------------------|--------|----|
| LW | 1                 |                   |                   |        |    |
| OW | 0.0537            | 1                 |                   |        |    |
| SO | 0.0635            | 0.9732            | 1                 |        |    |
| OF | <b>&lt;0.0001</b> | <b>&lt;0.0001</b> | <b>&lt;0.0001</b> | 1      |    |
| OP | <b>&lt;0.0001</b> | <b>&lt;0.0001</b> | <b>&lt;0.0001</b> | 0.4230 | 1  |

**Table S3. Differences in PPM community composition between groups.** Results of a two-way crossed analysis of similarities (ANOSIM) based on Bray-Curtis similarities of square root transformed PPM proportions with unordered factors. Differences were deemed significant when both  $R \geq 0.2$  and  $p < 0.05$ .

*Global Test*

| Factor      | Average R    | p-value      | No. Permutations | No. $\geq$ Observed |
|-------------|--------------|--------------|------------------|---------------------|
| Season *    | <b>0.734</b> | <b>0.001</b> | 999              | 0                   |
| Treatment * | <b>0.443</b> | <b>0.001</b> | 999              | 0                   |

*Pairwise Tests: Treatments*

| Comparison | Average R    | p-value      | No. Permutations | No. $\geq$ Observed |
|------------|--------------|--------------|------------------|---------------------|
| LW, SO     | 0.048        | <b>0.023</b> | 999              | 22                  |
| LW, OF *   | <b>0.737</b> | <b>0.001</b> | 999              | 0                   |
| LW, OP *   | <b>0.824</b> | <b>0.001</b> | 999              | 0                   |
| LW, OW     | 0.038        | 0.112        | 999              | 111                 |
| SO, OF *   | <b>0.727</b> | <b>0.001</b> | 999              | 0                   |
| SO, OP *   | <b>0.791</b> | <b>0.001</b> | 999              | 0                   |
| SO, OW     | 0.139        | <b>0.004</b> | 999              | 3                   |
| OF, OP     | 0.065        | <b>0.003</b> | 999              | 2                   |
| OF, OW *   | <b>0.494</b> | <b>0.001</b> | 999              | 0                   |
| OP, OW *   | <b>0.568</b> | <b>0.001</b> | 999              | 0                   |

**Table S4. Effects of temperature and salinity on PPM community composition.** Distance based linear model (DistLM) marginal test results based on Bray-Curtis similarities of square root transformed PPM proportions and raw environmental data. Pseudo-F is a multivariate analog to the Fisher's F test.

*Total sum of squares (SS) =  $7.76 \times 10^5$*

| Variable           | Sum of Squares (SS) | Pseudo-F | p-value      | % Variation Explained |
|--------------------|---------------------|----------|--------------|-----------------------|
| Temperature (°C) * | $1.54 \times 10^5$  | 55.51    | <b>0.001</b> | 19.8                  |
| Salinity (ppt) *   | $3.19 \times 10^4$  | 9.64     | <b>0.001</b> | 4.1                   |

**Table S5. Key PPM taxa defining each group.** Two-way similarity percentage analysis (SIMPER) results based on Bray-Curtis similarities of square root transformed PPM proportions. Key taxa are defined as those contributing  $\geq 10\%$  to the overall similarity between replicate samples.

*Group: January / Average similarity: 41.41%*

| ESV                                                               | Avg. Abundance | Avg. Similarity | Sim/SD | % Contribution | Cumulative % |
|-------------------------------------------------------------------|----------------|-----------------|--------|----------------|--------------|
| ESV_069904 (Vibrionaceae, <i>Vibrio</i> sp.)                      | 4.17           | 19.29           | 1.01   | 46.58          | 46.58        |
| ESV_033709 (Pseudoalteromonadaceae, <i>Pseudoalteromonas</i> sp.) | 1.26           | 4.27            | 0.84   | 10.31          | 56.89        |
| ESV_010267 (Pseudoalteromonadaceae, <i>Pseudoalteromonas</i> sp.) | 1.26           | 4.19            | 0.76   | 10.13          | 67.02        |

*Group: July / Average similarity: 53.80%*

| ESV                                                               | Avg. Abundance | Avg. Similarity | Sim/SD | % Contribution | Cumulative % |
|-------------------------------------------------------------------|----------------|-----------------|--------|----------------|--------------|
| ESV_010681 (Vibrionaceae, <i>Vibrio</i> sp.)                      | 6.61           | 30.79           | 1.22   | 57.24          | 57.24        |
| ESV_008978 (Pseudoalteromonadaceae, <i>Pseudoalteromonas</i> sp.) | 2.69           | 8.14            | 0.95   | 15.14          | 72.37        |

*Group: LW / Average similarity: 26.69%*

| ESV                                          | Avg. Abundance | Avg. Similarity | Sim/SD | % Contribution | Cumulative % |
|----------------------------------------------|----------------|-----------------|--------|----------------|--------------|
| ESV_010681 (Vibrionaceae, <i>Vibrio</i> sp.) | 2.99           | 24.79           | 0.82   | 92.90          | 92.90        |

*Group: OW / Average similarity: 33.42%*

| ESV                                          | Avg. Abundance | Avg. Similarity | Sim/SD | % Contribution | Cumulative % |
|----------------------------------------------|----------------|-----------------|--------|----------------|--------------|
| ESV_010681 (Vibrionaceae, <i>Vibrio</i> sp.) | 4.01           | 25.48           | 0.75   | 76.25          | 76.25        |
| ESV_069904 (Vibrionaceae, <i>Vibrio</i> sp.) | 1.76           | 5.42            | 0.28   | 16.21          | 92.46        |

*Group: SO / Average similarity: 19.69%*

| ESV                                          | Avg. Abundance | Avg. Similarity | Sim/SD | % Contribution | Cumulative % |
|----------------------------------------------|----------------|-----------------|--------|----------------|--------------|
| ESV_010681 (Vibrionaceae, <i>Vibrio</i> sp.) | 2.90           | 15.15           | 0.50   | 76.95          | 76.95        |

*Group: OF / Average similarity: 61.24%*

| ESV                                                               | Avg. Abundance | Avg. Similarity | Sim/SD | % Contribution | Cumulative % |
|-------------------------------------------------------------------|----------------|-----------------|--------|----------------|--------------|
| ESV_010681 (Vibrionaceae, <i>Vibrio</i> sp.)                      | 3.96           | 14.35           | 1.31   | 23.43          | 23.43        |
| ESV_069904 (Vibrionaceae, <i>Vibrio</i> sp.)                      | 3.75           | 13.98           | 0.87   | 22.82          | 46.25        |
| ESV_008978 (Pseudoalteromonadaceae, <i>Pseudoalteromonas</i> sp.) | 3.01           | 8.84            | 1.07   | 14.43          | 60.69        |
| ESV_010267 (Pseudoalteromonadaceae, <i>Pseudoalteromonas</i> sp.) | 2.42           | 6.22            | 1.31   | 10.16          | 70.85        |

*Group: OP / Average similarity: 66.55%*

| ESV                                                               | Avg. Abundance | Avg. Similarity | Sim/SD | % Contribution | Cumulative % |
|-------------------------------------------------------------------|----------------|-----------------|--------|----------------|--------------|
| ESV_010681 (Vibrionaceae, <i>Vibrio</i> sp.)                      | 4.11           | 14.33           | 1.43   | 21.54          | 21.54        |
| ESV_069904 (Vibrionaceae, <i>Vibrio</i> sp.)                      | 3.40           | 11.48           | 0.82   | 17.26          | 38.80        |
| ESV_008978 (Pseudoalteromonadaceae, <i>Pseudoalteromonas</i> sp.) | 3.23           | 10.68           | 2.02   | 16.05          | 54.84        |
| ESV_010267 (Pseudoalteromonadaceae, <i>Pseudoalteromonas</i> sp.) | 2.59           | 7.13            | 1.59   | 10.71          | 65.55        |
