# Supplementary material
Source: MDPI journal article supplement (https://www.mdpi.com/2076-3298/10/12/205)
Supplement: s1 [file s1]

Table S6. Taxonomic hierarchy of the 52 ESVs with 100% identity match to one or more potentially pathogenic microbes (PPM). PPM:TM indicates the ratio of PPM to total microbe (TM) matches at 100% identity. Citations document the pathogenicity of each taxon in humans (h), animals (a), or vascular plants / macroalgae (p). Asterisks denote suspected pathogens. Citation numbers correspond to references in main text.

| ESV                                            | Order             | Family                     | PPM Matches                                                                                                                                                                   | PPM:TM |
|------------------------------------------------|-------------------|----------------------------|-------------------------------------------------------------------------------------------------------------------------------------------------------------------------------|--------|
| P: Actinomycetota   C: Actinomycetes           |                   |                            |                                                                                                                                                                               |        |
| ESV_061096                                     | Mycobacteriales   | <i>Mycobacteriaceae</i>    | <i>Mycobacterium flavescens</i> [71] <sup>h</sup>                                                                                                                             | 1:1    |
| P: Bacteroidota   C: Bacteroidia               |                   |                            |                                                                                                                                                                               |        |
| ESV_016069                                     | Bacteroidales     | <i>Bacteroidaceae</i>      | <i>Bacteroides graminisolvens</i> [72] <sup>h*</sup>                                                                                                                          | 1:1    |
| ESV_073277                                     |                   | <i>Marinilabiliaceae</i>   | <i>Carboxylicivirga mesophila</i> [73] <sup>a*</sup>                                                                                                                          | 1:1    |
| P: Bacteroidota   C: Flavobacteriia            |                   |                            |                                                                                                                                                                               |        |
| ESV_000286                                     |                   |                            | <i>Flavobacterium succinicans</i> [74] <sup>a</sup>                                                                                                                           | 1:2    |
| ESV_000527                                     | Flavobacteriales  | <i>Flavobacteriaceae</i>   | <i>Flavobacterium tractae</i> (= <i>spartansii</i> ) [75] <sup>a</sup> , <i>F. succinicans</i> [74] <sup>a</sup>                                                              | 2:9    |
| ESV_065667                                     |                   |                            | <i>Flavobacterium indicum</i> [76] <sup>a*</sup>                                                                                                                              | 1:1    |
| ESV_069856                                     |                   |                            | <i>Tenacibaculum discolor</i> [77] <sup>a</sup> , <i>T. gallaicum</i> [77] <sup>a</sup> , <i>T. mesophilum</i> [78] <sup>a*</sup>                                             | 3:10   |
| P: Campylobacterota   C: Epsilonproteobacteria |                   |                            |                                                                                                                                                                               |        |
| ESV_072564                                     | Campylobacterales | <i>Arcobacteraceae</i>     | <i>Aliarcobacter</i> (= <i>Arcobacter</i> ) <i>cryaerophilus</i> [79] <sup>h, a</sup>                                                                                         | 1:1    |
| P: Bacillota   C: Bacilli                      |                   |                            |                                                                                                                                                                               |        |
| ESV_000077                                     | Bacillales        | <i>Bacillaceae</i>         | <i>Exiguobacterium aurantiacum</i> [80] <sup>h*</sup> , <i>E. profundum</i> [81] <sup>h</sup>                                                                                 | 2:7    |
| ESV_000004                                     | Lactobacillales   | <i>Streptococcaceae</i>    | <i>Streptococcus equinus</i> [82] <sup>h</sup> , <i>S. gallolyticus</i> [82] <sup>h</sup> , <i>S. infantarius</i> [82] <sup>h</sup> , <i>S. lutetiensis</i> [82] <sup>h</sup> | 4:4    |
| P: Bacillota   C: Clostridia                   |                   |                            |                                                                                                                                                                               |        |
| ESV_001146                                     | Eubacteriales     | <i>Clostridiaceae</i>      | <i>Clostridium disporicum</i> [83] <sup>h</sup> , <i>C. saudiense</i> [84] <sup>h</sup>                                                                                       | 2:2    |
| P: Pseudomonadota   C: Alphaproteobacteria     |                   |                            |                                                                                                                                                                               |        |
| ESV_005019                                     | Hyphomicrobiales  | <i>Methylobacteriaceae</i> | <i>Methylobacterium fujisawaense</i> [85] <sup>h</sup> , <i>M. mesophilicum</i> [86] <sup>h</sup> , <i>M. radiotolerans</i> [87] <sup>h</sup>                                 | 3:10   |
| P: Pseudomonadota   C: Betaproteobacteria      |                   |                            |                                                                                                                                                                               |        |
| ESV_016064                                     | Burkholderiales   | <i>Burkholderiaceae</i>    | <i>Ralstonia mannitolilytica</i> [88] <sup>h</sup> , <i>R. pickettii</i> [89] <sup>h</sup>                                                                                    | 2:2    |
| ESV_013699                                     |                   | <i>Comamonadaceae</i>      | <i>Paracidovorax</i> (= <i>Acidovorax</i> ) <i>anthurii</i> [36] <sup>p</sup>                                                                                                 | 1:3    |

P: Pseudomonadota | C: Gammaproteobacteria

|            |                 |                               |                                                                                                                                                                                                                                                                                                                                                                                                                                                                                                                                                                                                                                                                     |       |
|------------|-----------------|-------------------------------|---------------------------------------------------------------------------------------------------------------------------------------------------------------------------------------------------------------------------------------------------------------------------------------------------------------------------------------------------------------------------------------------------------------------------------------------------------------------------------------------------------------------------------------------------------------------------------------------------------------------------------------------------------------------|-------|
| ESV_000099 | Aeromonadales   | <i>Aeromonadaceae</i>         | <i>Aeromonas caviae</i> [90] <sup>h</sup> , <i>A. enteropelogenes</i> [91] <sup>h</sup> , <i>A. hydrophila</i> [90] <sup>h</sup> , <i>A. jandaei</i> [92] <sup>a</sup> , <i>A. veronii</i> [90] <sup>h</sup>                                                                                                                                                                                                                                                                                                                                                                                                                                                        | 5:6   |
| ESV_008978 | Alteromonadales | <i>Pseudoalteromonadaceae</i> | <i>Pseudoalteromonas agarivorans</i> [93] <sup>a</sup> , <i>P. arctica</i> [94] <sup>p</sup> , <i>P. elyakovii</i> [38] <sup>p</sup> , <i>P. marina</i> [39] <sup>p</sup> , <i>P. piratica</i> [95] <sup>a</sup> , <i>P. spongiae</i> [96] <sup>a</sup>                                                                                                                                                                                                                                                                                                                                                                                                             | 6:13  |
| ESV_010267 |                 |                               | <i>Pseudoalteromonas agarivorans</i> [93] <sup>a</sup> , <i>P. atlantica</i> [97] <sup>a</sup> , <i>P. shioyasakiensis</i> [98] <sup>a</sup> , <i>P. tetraodonis</i> [99] <sup>a</sup> , <i>P. undina</i> [100] <sup>a</sup>                                                                                                                                                                                                                                                                                                                                                                                                                                        | 5:22  |
| ESV_010708 |                 |                               | <i>Pseudoalteromonas piscicida</i> [40] <sup>p</sup>                                                                                                                                                                                                                                                                                                                                                                                                                                                                                                                                                                                                                | 1:7   |
| ESV_033709 |                 |                               | <i>Pseudoalteromonas tunicata</i> [101] <sup>a, p</sup>                                                                                                                                                                                                                                                                                                                                                                                                                                                                                                                                                                                                             | 1:2   |
| ESV_073099 |                 |                               | <i>Algicola bacteriolytica</i> [102] <sup>p</sup>                                                                                                                                                                                                                                                                                                                                                                                                                                                                                                                                                                                                                   | 1:1   |
| ESV_073199 |                 |                               | <i>Pseudoalteromonas agarivorans</i> [93] <sup>a</sup>                                                                                                                                                                                                                                                                                                                                                                                                                                                                                                                                                                                                              | 1:1   |
| ESV_073723 |                 |                               | <i>Pseudoalteromonas piscicida</i> [40] <sup>p</sup>                                                                                                                                                                                                                                                                                                                                                                                                                                                                                                                                                                                                                | 1:1   |
| ESV_073028 |                 | <i>Alteromonadaceae</i>       | <i>Agarivorans albus</i> [103] <sup>p</sup>                                                                                                                                                                                                                                                                                                                                                                                                                                                                                                                                                                                                                         | 1:2   |
| ESV_073069 |                 | <i>Shewanellaceae</i>         | <i>Shewanella colwelliana</i> [104] <sup>a</sup>                                                                                                                                                                                                                                                                                                                                                                                                                                                                                                                                                                                                                    | 1:2   |
| ESV_073075 |                 |                               | <i>Shewanella aquimarina</i> [105] <sup>a</sup> , <i>S. marisflavi</i> [106] <sup>a</sup>                                                                                                                                                                                                                                                                                                                                                                                                                                                                                                                                                                           | 2:10  |
| ESV_073097 |                 |                               | <i>Shewanella colwelliana</i> [104] <sup>a</sup>                                                                                                                                                                                                                                                                                                                                                                                                                                                                                                                                                                                                                    | 1:1   |
| ESV_073179 |                 |                               | <i>Shewanella aquimarina</i> [105] <sup>a</sup>                                                                                                                                                                                                                                                                                                                                                                                                                                                                                                                                                                                                                     | 1:2   |
| ESV_075534 |                 | <i>Ferrimonadaceae</i>        | <i>Ferrimonas balearica</i> [107] <sup>h*, a*</sup>                                                                                                                                                                                                                                                                                                                                                                                                                                                                                                                                                                                                                 | 1:1   |
| ESV_010485 | Vibrionales     | <i>Vibrionaceae</i>           | <i>Vibrio areninigræ</i> [108] <sup>a</sup> , <i>V. hispanicus</i> [109] <sup>a</sup>                                                                                                                                                                                                                                                                                                                                                                                                                                                                                                                                                                               | 2:2   |
| ESV_010582 |                 |                               | <i>Vibrio fortis</i> [34] <sup>a</sup>                                                                                                                                                                                                                                                                                                                                                                                                                                                                                                                                                                                                                              | 1:1   |
| ESV_010584 |                 |                               | <i>Photobacterium rosenbergii</i> [9] <sup>a*</sup> , <i>P. sanctipauli</i> [110] <sup>a*</sup>                                                                                                                                                                                                                                                                                                                                                                                                                                                                                                                                                                     | 2:5   |
| ESV_010681 |                 |                               | <i>Vibrio alginolyticus</i> [111] <sup>h</sup> , <i>V. antiquarius</i> [112] <sup>h*</sup> , <i>V. brasiliensis</i> [113] <sup>a</sup> , <i>V. campbellii</i> [114] <sup>a</sup> , <i>V. coralliilyticus</i> [115] <sup>a</sup> , <i>V. harveyi</i> [35] <sup>a</sup> , <i>V. ichthyoenteri</i> [33] <sup>a</sup> , <i>V. neptunius</i> [116] <sup>a</sup> , <i>V. owensii</i> [117] <sup>a</sup> , <i>V. parahaemolyticus</i> [118] <sup>h</sup> , <i>V. ponticus</i> [119] <sup>a</sup> , <i>V. rotiferianus</i> [120] <sup>a</sup> , <i>V. scopthalmi</i> [121] <sup>a</sup> , <i>V. sinaloensis</i> [122] <sup>a</sup> , <i>V. tubiashii</i> [123] <sup>a</sup> | 15:26 |
| ESV_010771 |                 |                               | <i>Photobacterium phosphoreum</i> [124] <sup>a</sup> , <i>P. sanguinicancrici</i> [125] <sup>a</sup> , <i>P. swingsii</i> [126] <sup>a</sup>                                                                                                                                                                                                                                                                                                                                                                                                                                                                                                                        | 3:9   |
| ESV_010878 |                 |                               | <i>Vibrio coralliilyticus</i> [115] <sup>a</sup> , <i>V. ponticus</i> [119] <sup>a</sup> , <i>V. rotiferianus</i> [120] <sup>a</sup>                                                                                                                                                                                                                                                                                                                                                                                                                                                                                                                                | 3:6   |
| ESV_011548 |                 |                               | <i>Vibrio fortis</i> [34] <sup>a</sup> , <i>V. mediterranei</i> (= <i>shilonii</i> ) [109] <sup>a</sup> , <i>V. parahaemolyticus</i> [118] <sup>h</sup> , <i>V. vulnificus</i> [118] <sup>h</sup>                                                                                                                                                                                                                                                                                                                                                                                                                                                                   | 4:4   |
| ESV_012016 |                 |                               | <i>Vibrio ponticus</i> [119] <sup>a</sup>                                                                                                                                                                                                                                                                                                                                                                                                                                                                                                                                                                                                                           | 1:3   |

|            |                   |                           |                                                                                                                                                                                                                                                                                                           |      |
|------------|-------------------|---------------------------|-----------------------------------------------------------------------------------------------------------------------------------------------------------------------------------------------------------------------------------------------------------------------------------------------------------|------|
| ESV_024808 |                   |                           | <i>Vibrio fluvialis</i> [127], <i>V. furnissii</i> [128] <sup>h*, a</sup> , <i>V. parahaemolyticus</i> [118] <sup>h</sup> , <i>V. tubiashii</i> [123] <sup>a</sup>                                                                                                                                        | 4:5  |
| ESV_028966 |                   |                           | <i>Photobacterium damsela</i> [129] <sup>h, a</sup>                                                                                                                                                                                                                                                       | 1:1  |
| ESV_036327 |                   |                           | <i>Vibrio campbellii</i> [114] <sup>a</sup> , <i>V. mediterranei</i> (= <i>shilonii</i> ) [109] <sup>a</sup> , <i>V. sinaloensis</i> [122] <sup>a</sup>                                                                                                                                                   | 3:3  |
| ESV_061507 |                   |                           | <i>Aliivibrio fischeri</i> [130] <sup>a</sup> , <i>A. salmonicida</i> [131] <sup>a</sup> , <i>A. wodanis</i> [132] <sup>a</sup>                                                                                                                                                                           | 3:6  |
| ESV_069699 |                   |                           | <i>Vibrio aestuarianus</i> [133] <sup>a</sup> , <i>V. mediterranei</i> (= <i>shilonii</i> ) [109] <sup>a</sup>                                                                                                                                                                                            | 2:3  |
| ESV_069904 |                   |                           | <i>Vibrio celticus</i> [134] <sup>a*</sup> , <i>V. chagasii</i> [135] <sup>a</sup> , <i>V. crassostreae</i> [136] <sup>a</sup> , <i>V. cyclitrophicus</i> [137] <sup>a</sup> , <i>V. kanaloae</i> [138] <sup>a</sup> , <i>V. splendidus</i> [139] <sup>a</sup> , <i>V. toranzoniae</i> [140] <sup>a</sup> | 7:11 |
| ESV_073082 |                   |                           | <i>Vibrio tapetis</i> [141] <sup>a</sup>                                                                                                                                                                                                                                                                  | 1:3  |
| ESV_073083 |                   |                           | <i>Vibrio ponticus</i> [119] <sup>a</sup>                                                                                                                                                                                                                                                                 | 1:1  |
| ESV_073334 |                   |                           | <i>Vibrio diazotrophicus</i> [142] <sup>a</sup>                                                                                                                                                                                                                                                           | 1:2  |
| ESV_073721 |                   |                           | <i>Vibrio ezurae</i> [34] <sup>a</sup> , <i>V. penaeicida</i> [143] <sup>a</sup>                                                                                                                                                                                                                          | 2:10 |
| ESV_073731 |                   |                           | <i>Vibrio campbellii</i> [114] <sup>a</sup>                                                                                                                                                                                                                                                               | 1:1  |
| ESV_075146 |                   |                           | <i>V. mediterranei</i> (= <i>shilonii</i> ) [109] <sup>a</sup>                                                                                                                                                                                                                                            | 1:3  |
| ESV_075595 |                   |                           | <i>Photobacterium ganghwense</i> [96] <sup>a</sup>                                                                                                                                                                                                                                                        | 1:1  |
| ESV_001828 | Cellvibrionales   | <i>Cellvibrionaceae</i>   | <i>Cellvibrio fibrivorans</i> [37] <sup>p</sup>                                                                                                                                                                                                                                                           | 1:4  |
| ESV_073954 | Oceanospirillales | <i>Oceanospirillaceae</i> | <i>Oceanospirillum sanctuarii</i> [144] <sup>a*</sup>                                                                                                                                                                                                                                                     | 1:3  |
| ESV_008293 | Pseudomonadales   | <i>Pseudomonadaceae</i>   | <i>Pseudomonas mendocina</i> [145] <sup>h</sup> , <i>P. oleovorans</i> [146] <sup>h</sup> , <i>P. putida</i> [147] <sup>h</sup> , <i>P. (= Stutzerimonas) stutzeri</i> [148] <sup>h</sup>                                                                                                                 | 4:4  |

---
